# Supplementary material for: Sweat Proteomics in Cystic Fibrosis: Discovering Companion Biomarkers for Precision Medicine and Therapeutic Development
Source: MDPI journal article supplement (doi:10.3390/cells11152358), 2022-07-31
Supplement: s1 [file s1]

# **Sweat proteomics in Cystic Fibrosis: discovering companion biomarkers for precision medicine and therapeutic development.**

Bastien Burat<sup>1a</sup>, Audrey Reynaerts<sup>2</sup>, Dominique Baiwir<sup>3</sup>, Maximilien Fléron<sup>3</sup>, Sophie Gohy<sup>4,5,6</sup>, Gauthier Eppe<sup>1</sup>, Teresinha Leal<sup>2b</sup>, Gabriel Mazzucchelli<sup>1ab</sup>

<sup>1</sup> Mass Spectrometry Laboratory, MolSys Research Unit, Liège Université, B-4000 Liège, Belgium; g.eppe@uliege.be (G.E.)

<sup>2</sup> Louvain Center for Toxicology and Applied Pharmacology (LTAP), Institut de Recherche Expérimentale et Clinique (IREC), Université Catholique de Louvain, B-1200, Brussels, Belgium; audrey.reynaerts@saintluc.uclouvain.be (A.R.); teresinha.leal@uclouvain.be (T.L.)

<sup>3</sup> GIGA Proteomics Facility, Liège Université, B-4000, Liège, Belgium; d.baiwir@uliege.be (D.B.); m.fleron@uliege.be (M.F.)

<sup>4</sup> Cystic Fibrosis Reference Center, Cliniques Universitaires Saint-Luc, Université catholique de Louvain, B-1200, Brussels, Belgium; sophie.gohy@uclouvain.be (S.G.)

<sup>5</sup> Department of Pneumology, Cliniques Universitaires Saint-Luc, Université catholique de Louvain, B-1200, Brussels, Belgium; sophie.gohy@uclouvain.be (S.G.)

<sup>6</sup> Pole of Pneumology, ENT and Dermatology, Institut de Recherche Expérimentale et Clinique (IREC), Université Catholique de Louvain, B-1200, Brussels, Belgium; sophie.gohy@uclouvain.be (S.G.)

<sup>a</sup> corresponding authors

<sup>b</sup> equal contributors as last authors

Correspondence: bastien.burat@uliege.be (B.B.), gabriel.mazzucchelli@uliege.be  
(G.M.)

Phone: +32 (0) 4 366 34 11; fax: +32 (0) 4 366 43 87 (G.M.)

**Supplementary Information**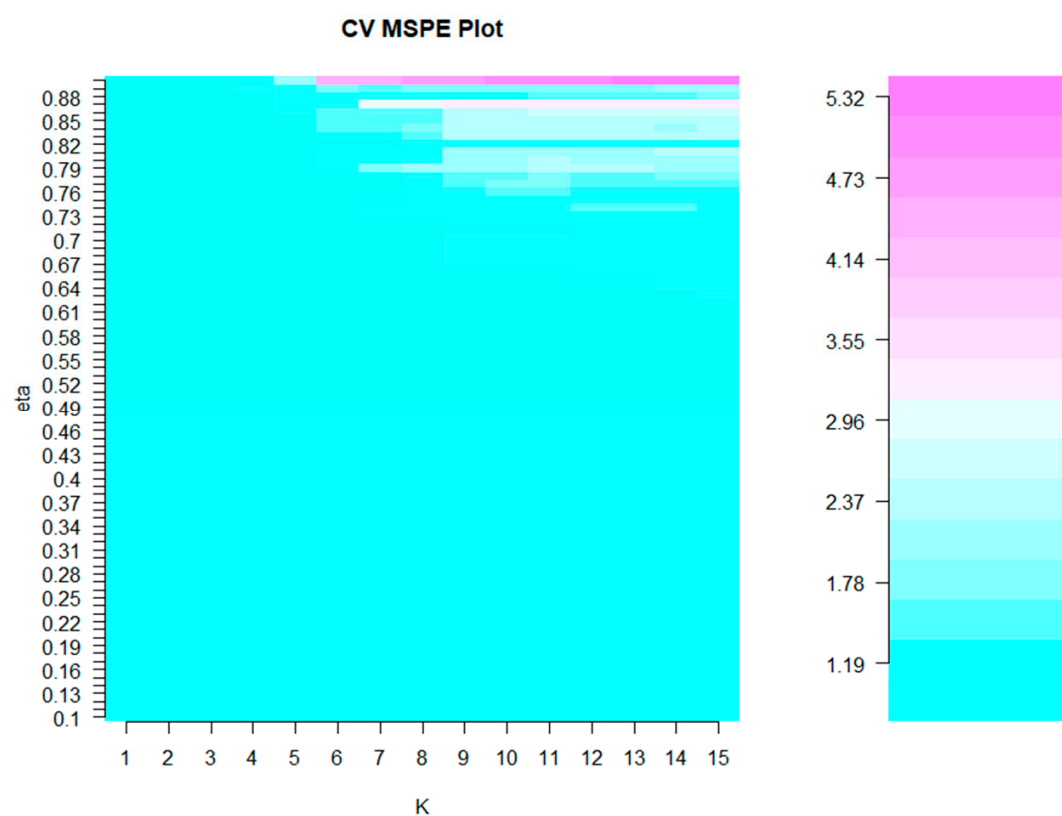

Supplementary Figure S1 – Mean Square Prediction Error (MSPE) plot for the determination of SPLS parameters. Minimal MSPE was obtained for  $\eta = 0.69$  and  $k = 2$ .

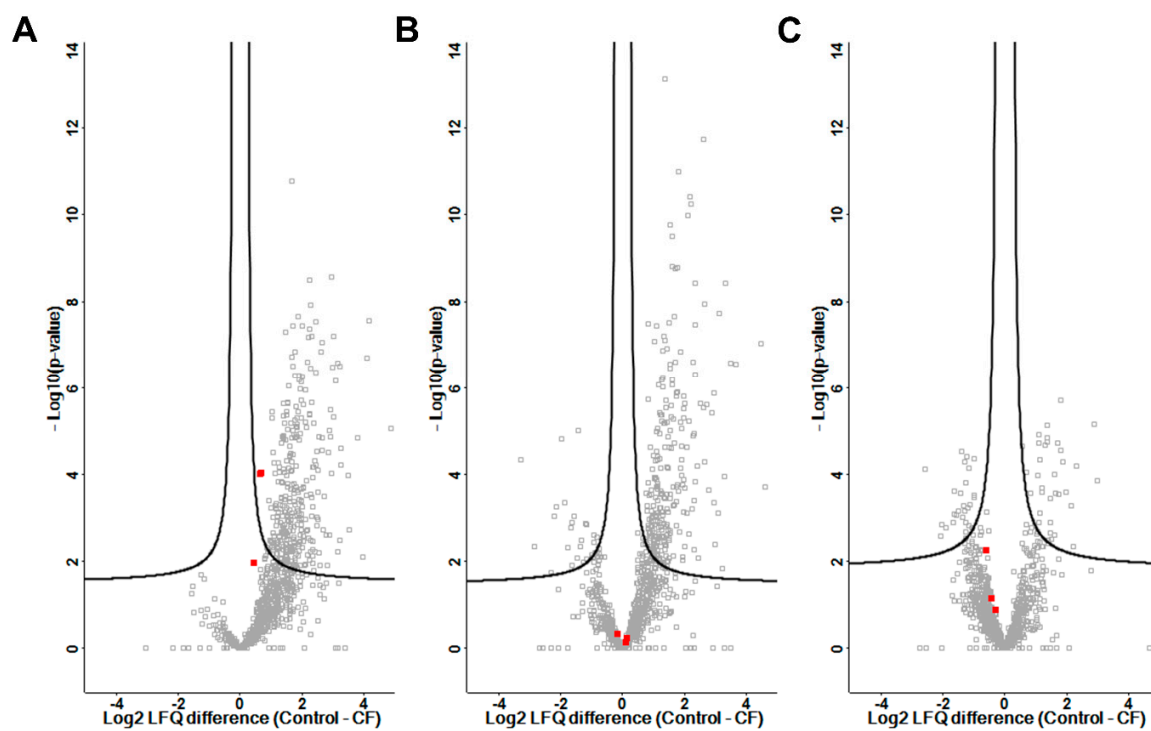

Supplementary Figure S2 – Separated LFQ normalization was applied to raw data since global LFQ normalization elicited a quantification bias. Volcano plot visualization after: A, no normalization, B, separated LFQ normalization, C, global LFQ normalization. Proteins from the MPDS Mix 1 standard mixture were highlighted in red filled squares.

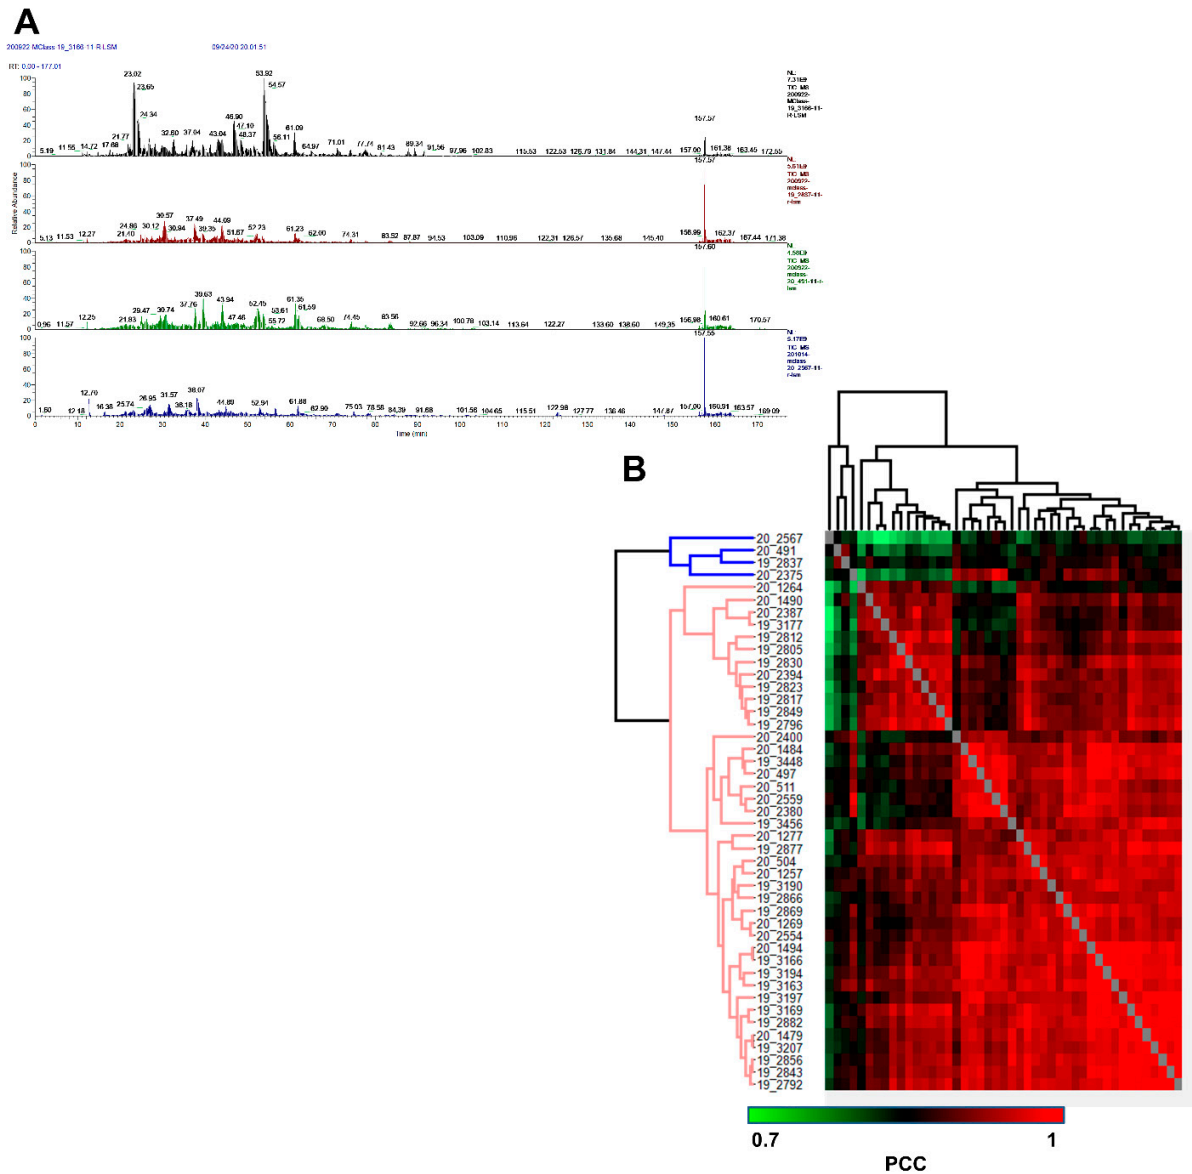

Supplementary Figure S3 – Discarded samples based on chromatogram discrepancy and poor correlation with other samples' protein profiles. a. TIC comparison. Reference TIC (black), TIC of discarded samples (red, green and blue). b. Heat-map representation of 30 control and 15 CF sweat protein profiles. Hierarchical clustering of Pearson's correlation coefficients generated using average Euclidian distance matrix.

| Protein IDs | Age (years) (1) | Sex (2) | BMI (kg/m <sup>2</sup> ) (3) | Collected volume (μL) (right arm) (4) | Collected volume (μL) (left arm) (5) | [Na <sup>+</sup> ] (mM) (6) | [Cl <sup>-</sup> ] (mM) (7) | [K <sup>+</sup> ] (mM) (8) | [Protein] (μg/μL) (9) | Na <sup>+</sup> (μmol) (10) | Cl <sup>-</sup> (μmol) (11) | K <sup>+</sup> (μmol) (12) | Protein (μg) (13) |
|-------------|-----------------|---------|------------------------------|---------------------------------------|--------------------------------------|-----------------------------|-----------------------------|----------------------------|-----------------------|-----------------------------|-----------------------------|----------------------------|-------------------|
| O00264      | -0.006          | 0.009   | -0.007                       | -0.003                                | -0.004                               | -0.022                      | -0.024                      | -0.012                     | 0.0004                | -0.02                       | -0.023                      | -0.013                     | -0.003            |
| O14818      | -0.006          | 0.007   | -0.003                       | -0.001                                | -0.002                               | -0.02                       | -0.021                      | -0.012                     | -0.002                | -0.017                      | -0.019                      | -0.011                     | -0.003            |
| O15144      | 0.001           | 0.004   | -0.008                       | -0.006                                | -0.005                               | 0.001                       | 0.001                       | 0.005                      | 0.007                 | -0.003                      | -0.002                      | -0.003                     | 0.001             |
| O43396      | 0.004           | 0.001   | -0.006                       | -0.006                                | -0.004                               | 0.01                        | 0.01                        | 0.01                       | 0.008                 | 0.005                       | 0.006                       | 0.002                      | 0.002             |

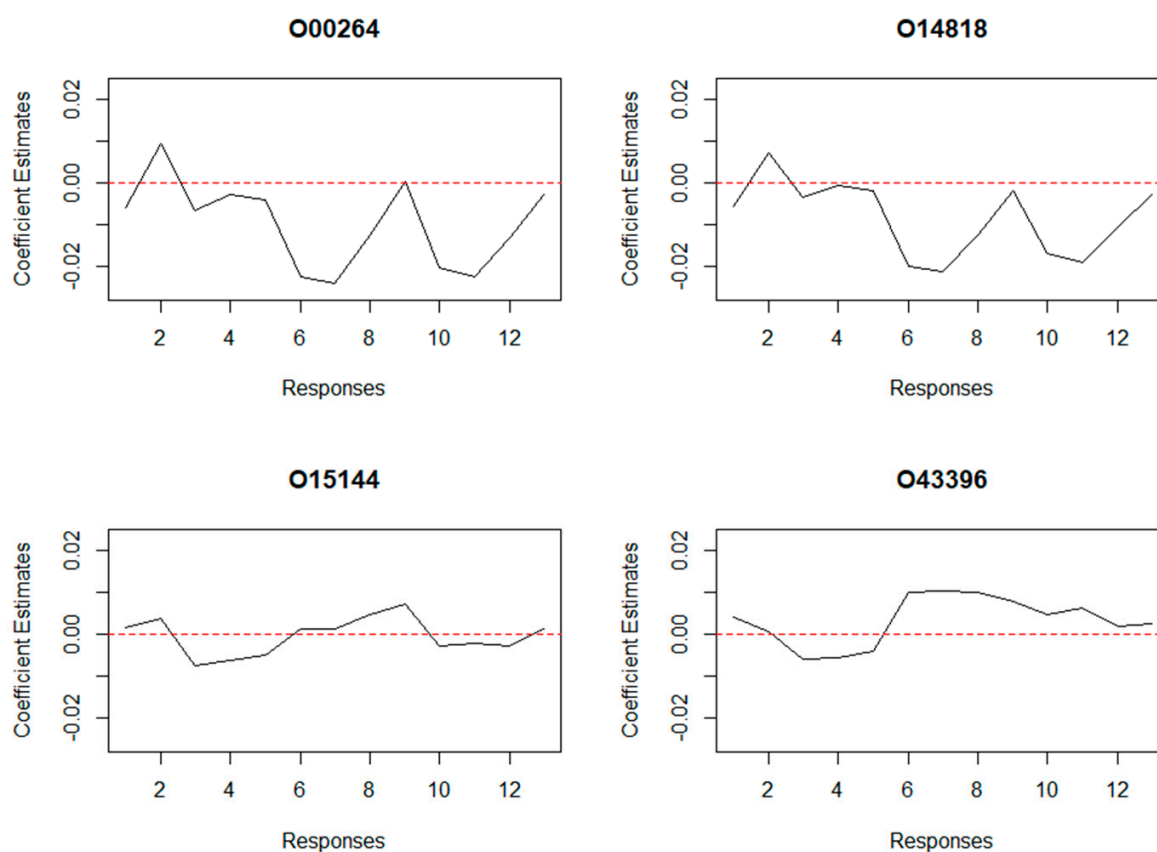

Supplementary Figure S4 – Plot of the estimated coefficients of the first four sweat proteins selected as important variables for all responses, following SPLS regression.

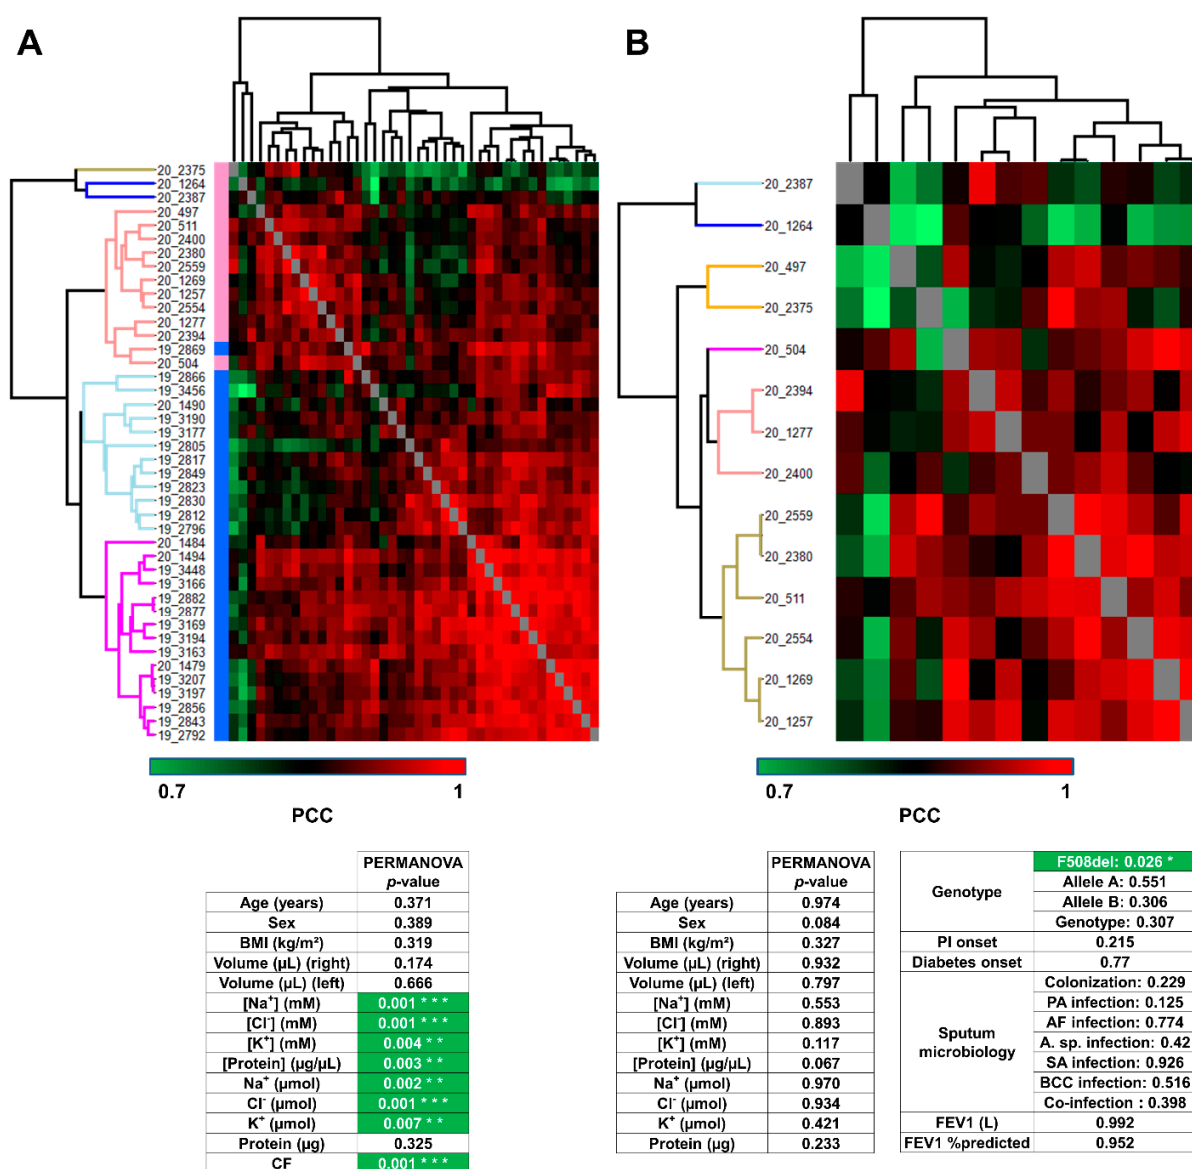

Supplementary Figure S5 – Sweat CF biomarker profiles discriminated patients with CF from control subjects, in correlation with CFTR genotype. A. Heat-map representation of control versus CF sweat CF biomarker profiles. Control samples (blue color bar), CF samples (pink color bar). B. Heat-map representation of CF sweat CF biomarker profiles. Hierarchical clustering of Pearson's correlation coefficients using average Euclidian distance matrix. PERMANOVA test for significance of correlation between clustering & clinical data distribution (number of permutations=999).
